# Supplementary material
Source: HighWire-hosted journal article supplement (https://bmjopen.bmj.com/content/10/7/e038571)
Supplement: inline-supplementary-material-1 [file inline-supplementary-material-1.pdf]

## Supplementary Appendix A: PRISMA-P checklist

| Section and topic          | Item No | Checklist item                                                                                                                                                                                                                  | Page # |
|----------------------------|---------|---------------------------------------------------------------------------------------------------------------------------------------------------------------------------------------------------------------------------------|--------|
| ADMINISTRATIVE INFORMATION |         |                                                                                                                                                                                                                                 |        |
| Title:                     |         |                                                                                                                                                                                                                                 |        |
| Identification             | 1a      | Identify the report as a protocol of a systematic review                                                                                                                                                                        | 1      |
| Update                     | 1b      | If the protocol is for an update of a previous systematic review, identify as such                                                                                                                                              | NA     |
| Registration               | 2       | If registered, provide the name of the registry (such as PROSPERO) and registration number                                                                                                                                      | 2      |
| Authors:                   |         |                                                                                                                                                                                                                                 |        |
| Contact                    | 3a      | Provide name, institutional affiliation, e-mail address of all protocol authors; provide physical mailing address of 1 corresponding author                                                                                     | 11     |
| Contributions              | 3b      | Describe contributions of protocol authors and identify the guarantor of the review                                                                                                                                             | 11     |
| Amendments                 | 4       | If the protocol represents an amendment of a previously completed or published protocol, identify as such and list 6 changes; otherwise, state plan for documenting important protocol amendments                               | 6      |
| Support:                   |         |                                                                                                                                                                                                                                 |        |
| Sources                    | 5a      | Indicate sources of financial or other support for the review                                                                                                                                                                   | 11     |
| Sponsor                    | 5b      | Provide name for the review funder and/or sponsor                                                                                                                                                                               | NA     |
| Role of sponsor or funder  | 5c      | Describe roles of funder(s), sponsor(s), and/or institution(s), if any, in developing the protocol                                                                                                                              | NA     |
| INTRODUCTION               |         |                                                                                                                                                                                                                                 |        |
| Rationale                  | 6       | Describe the rationale for the review in the context of what is already known                                                                                                                                                   | 4      |
| Objectives                 | 7       | Provide an explicit statement of the question(s) the review will address with reference to participants, interventions, 5 comparators, and outcomes (PICO)                                                                      | 5      |
| METHODS                    |         |                                                                                                                                                                                                                                 |        |
| Eligibility criteria       | 8       | Specify the study characteristics (such as PICO, study design, setting, time frame) and report characteristics (such as 6 years considered, language, publication status) to be used as criteria for eligibility for the review | 6      |

|                                    |     |                                                                                                                                                                                                                                                    |    |
|------------------------------------|-----|----------------------------------------------------------------------------------------------------------------------------------------------------------------------------------------------------------------------------------------------------|----|
| Information sources                | 9   | Describe all intended information sources (such as electronic databases, contact with study authors, trial registers or other grey literature sources) with planned dates of coverage                                                              |    |
| Search strategy                    | 10  | Present draft of search strategy to be used for at least one electronic database, including planned limits, such that it 6,7 could be repeated                                                                                                     |    |
| Study records:                     |     |                                                                                                                                                                                                                                                    |    |
| Data management                    | 11a | Describe the mechanism(s) that will be used to manage records and data throughout the review                                                                                                                                                       | 7  |
| Selection process                  | 11b | State the process that will be used for selecting studies (such as two independent reviewers) through each phase of the review (that is, screening, eligibility and inclusion in meta-analysis)                                                    | 7  |
| Data collection process            | 11c | Describe planned method of extracting data from reports (such as piloting forms, done independently, in duplicate), 7 any processes for obtaining and confirming data from investigators                                                           | 7  |
| Data items                         | 12  | List and define all variables for which data will be sought (such as PICO items, funding sources), any pre-planned data 7 assumptions and simplifications                                                                                          | 7  |
| Outcomes and prioritization        | 13  | List and define all outcomes for which data will be sought, including prioritization of main and additional outcomes, 8 with rationale                                                                                                             | 8  |
| Risk of bias in individual studies | 14  | Describe anticipated methods for assessing risk of bias of individual studies, including whether this will be done at the NA outcome or study level, or both; state how this information will be used in data synthesis                            | NA |
| Data synthesis                     | 15a | Describe criteria under which study data will be quantitatively synthesised                                                                                                                                                                        | 9  |
|                                    | 15b | If data are appropriate for quantitative synthesis, describe planned summary measures, methods of handling data and 9 methods of combining data from studies, including any planned exploration of consistency (such as $I^2$ , Kendall's $\tau$ ) | 9  |
|                                    | 15c | Describe any proposed additional analyses (such as sensitivity or subgroup analyses, meta-regression)                                                                                                                                              | 9  |
|                                    | 15d | If quantitative synthesis is not appropriate, describe the type of summary planned                                                                                                                                                                 | NA |
| Meta-bias(es)                      | 16  | Specify any planned assessment of meta-bias(es) (such as publication bias across studies, selective reporting within NA studies)                                                                                                                   | NA |
| Confidence in cumulative evidence  | 17  | Describe how the strength of the body of evidence will be assessed (such as GRADE)                                                                                                                                                                 | NA |

NA, not applicable.

## Supplementary Appendix B: Search strategy

MEDLINE(R) Epub Ahead of Print, In-Process & Other Non-Indexed Citations, MEDLINE(R) Daily and Ovid MEDLINE(R) 1946 to Present [Ovid]

Embase 1996 to 2020 March 13

| #  | Searches                                                                                                                                                                                                          |
|----|-------------------------------------------------------------------------------------------------------------------------------------------------------------------------------------------------------------------|
| 1  | (Systematic Review or Systematic Reviews as Topic or Meta-Analysis or Meta-Analysis as Topic).sh.                                                                                                                 |
| 2  | (meta-analy* or metaanaly* or metanaly* or (systematic adj (review* or overview*))).ti,ab.                                                                                                                        |
| 3  | or/1-2                                                                                                                                                                                                            |
| 4  | (Observational Study or Observational Study as Topic or Cohort Studies or Longitudinal Studies or Follow-Up Studies or Case-Control Studies or Epidemiologic Studies).sh.                                         |
| 5  | ((observational or prospective or retrospective or cohort* or longitudinal or follow-up or case-cohort or "case-control" or "case control" or epidemiolog*) adj3 (stud* or research* or data* or cohort*)).ti,ab. |
| 6  | or/4-5                                                                                                                                                                                                            |
| 7  | (Comment or Letter or Editorial).sh.                                                                                                                                                                              |
| 8  | Animal/                                                                                                                                                                                                           |
| 9  | Human/                                                                                                                                                                                                            |
| 10 | 8 not (8 and 9)                                                                                                                                                                                                   |
| 11 | Or/7,10                                                                                                                                                                                                           |
| 12 | 3 and 6                                                                                                                                                                                                           |
| 13 | 12 not 11                                                                                                                                                                                                         |
| 14 | limit 13 to yr = "2019"                                                                                                                                                                                           |
| 15 | Limit 14 to English language                                                                                                                                                                                      |
| 16 | Limit 15 to conference abstract status                                                                                                                                                                            |
| 17 | 15 not 16                                                                                                                                                                                                         |

## Epistemonikos

| # | Searches                                                                                                                                                                                                                                                                                                                                                                                                                                                                                                                                                                                                                                                                                                                                                           |
|---|--------------------------------------------------------------------------------------------------------------------------------------------------------------------------------------------------------------------------------------------------------------------------------------------------------------------------------------------------------------------------------------------------------------------------------------------------------------------------------------------------------------------------------------------------------------------------------------------------------------------------------------------------------------------------------------------------------------------------------------------------------------------|
| 1 | title:(observational) OR title:(prospective) OR title:(retrospective) OR title:(cohort*) OR title:(longitudinal) OR title:("follow-up stud*") OR title:("follow-up data*") OR title:(case-cohort) OR title:(case-control) OR title:("case control") OR title:("epidemiological stud*") OR title:("epidemiological data*") OR abstract:(observational) OR abstract:(prospective) OR abstract:(retrospective) OR abstract:(cohort*) OR abstract:(longitudinal) OR abstract:("follow-up stud*") OR abstract:("follow-up data*") OR abstract:(case-cohort) OR abstract:(case-control) OR abstract:("case control") OR abstract:("epidemiological stud*") OR abstract:("epidemiological data*")<br>[Filter] Publication year: 2019, Publication type: systematic review |
